# Supplementary material for: Plasmon-enhanced stimulated Raman scattering microscopy with single-molecule detection sensitivity
Source: PubMed Central journal article supplement (PMC6872561; doi:10.1038/s41467-019-13230-1), 2019-11-21
Supplement: 41467_2019_13230_MOESM3_ESM.pdf [file 41467_2019_13230_MOESM3_ESM.pdf]

## **Description of Additional Supplementary Files**

File Name: Supplementary Movie 1

Description: Time-series PESRS image of 1 mM adenine adsorbed on surface. The color of each pixel represents the peak area at 733 cm<sup>-1</sup> after BM4D denoising and background subtraction.

File Name: Supplementary Movie 2

Description: Time-series PESRS image of 50 nM adenine adsorbed on surface. The color of each pixel represents the peak area at 733 cm<sup>-1</sup> after BM4D denoising and background subtraction.
